# Supplementary material
Source: publisher figshare collection journal article supplement (https://acs.figshare.com/ndownloader/files/4206853)
Supplement: Supplementary file 1 [file 4206853]

# Polyaniline/vanadium pentoxide layer-by-layer electrodes for energy storage

*Lin Shao,<sup>1</sup> Ju-Won Jeon<sup>2</sup> and Jodie L. Lutkenhaus<sup>2\*</sup>*

1. Department of Chemical & Environmental Engineering, Yale University, New Haven, Connecticut. 06511
2. Department of Chemical Engineering, Texas A&M University, College Station, Texas. 77843

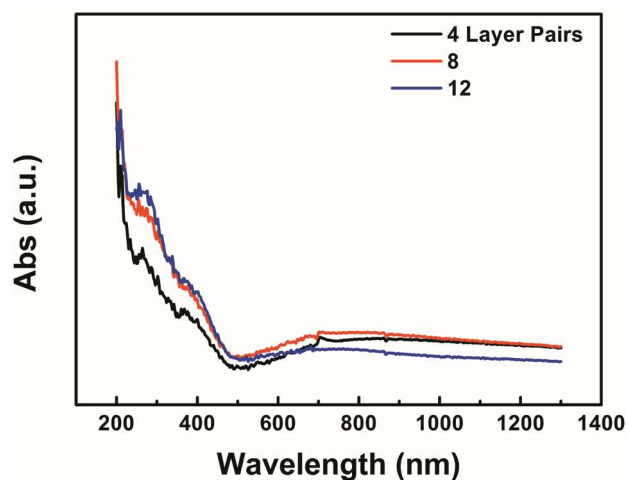

**Figure S1.** UV-Vis spectra of H-PANI/V<sub>2</sub>O<sub>5</sub> LbL films assembled at pH 2. The absorption intensity does not increase with layer pair number, suggesting that LbL growth was unsuccessful.

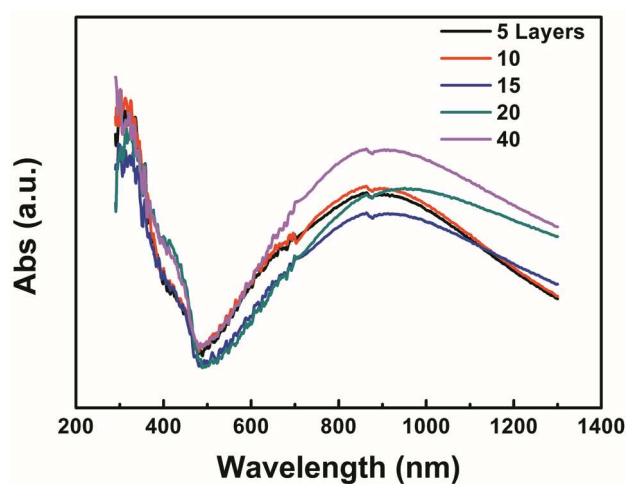

**Figure S2.** UV-Vis spectra of LbL films, where H-PANI is the only dipping solution. Rinsing between steps was conducted as described in the Experimental Section. The absorbance does not monotonically increase with layer pair, indicating poor growth.

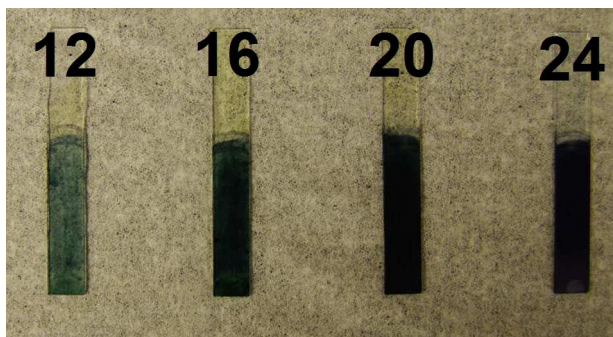

**Figure S3.** APTES( $V_2O_5/C\text{-PANI}$ )<sub>n</sub> LbL films of varying number of layer pairs.

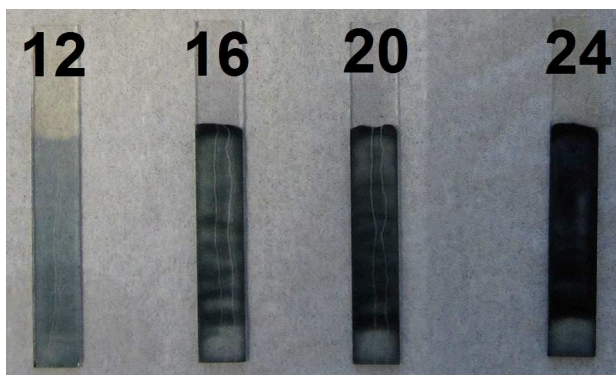

**Figure S4.** APTES( $V_2O_5$ /H-PANI) $_n$  LbL films of varying number of layer pairs. The scratches were made for profilometry measurements.

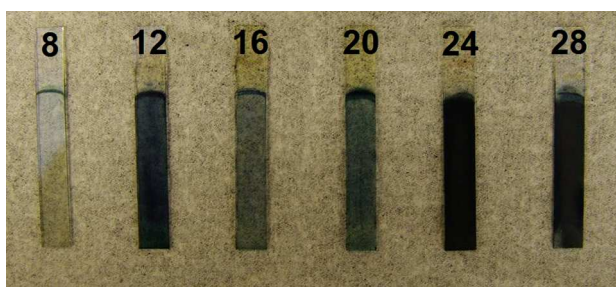

**Figure S5.** PEI( $V_2O_5$ /C-PANI) $_n$  LbL films. Here, the variation in transparency indicates poor growth.

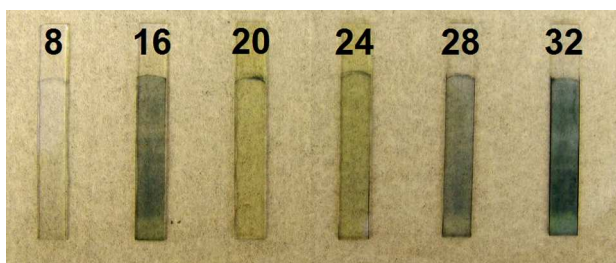

**Figure S6.** PEI( $V_2O_5$ /H-PANI) $_n$  LbL films. Here, the variation in transparency indicates poor growth.

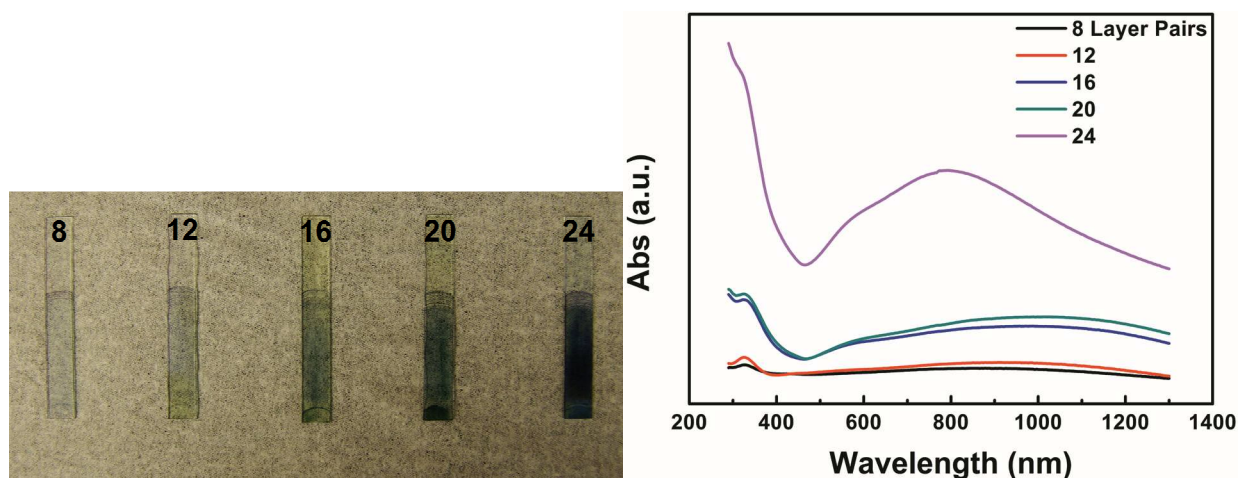

**Figure S7.** Images and UV-Vis spectra of NMP(V<sub>2</sub>O<sub>5</sub>/C-PANI)<sub>n</sub> LbL films. Here, the variation in transparency indicates poor growth.

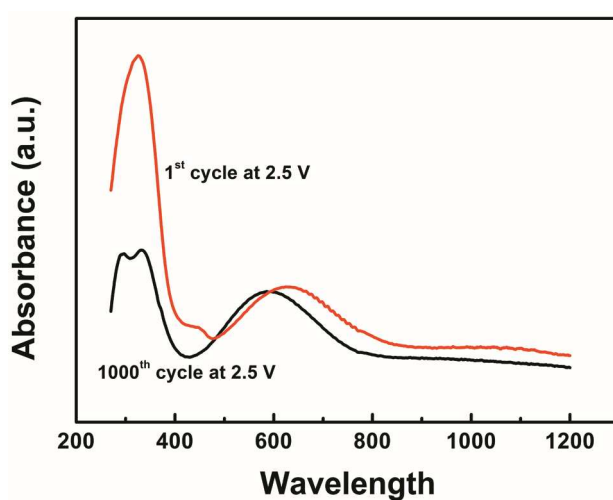

**Figure S8.** UV-Vis spectra of APTES(V<sub>2</sub>O<sub>5</sub>/C-PANI)<sub>12</sub> LbL films at 2.5 V before and after 1,000 charge-discharge cycles.

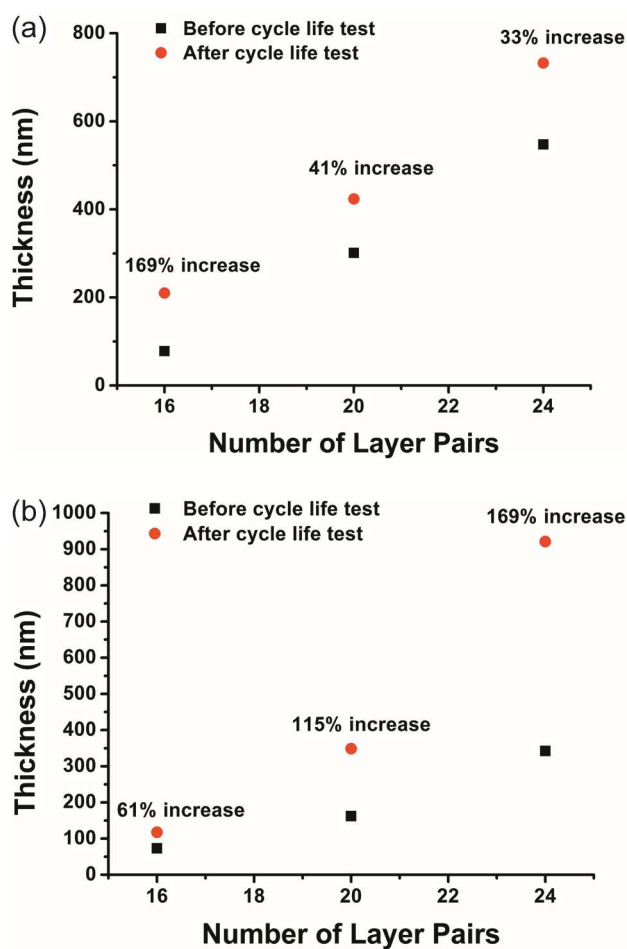

**Figure S9.** Thickness comparison for (a) APTES(V<sub>2</sub>O<sub>5</sub>/C-PANI)<sub>n</sub> and (b) APTES(V<sub>2</sub>O<sub>5</sub>/H-PANI)<sub>n</sub> LbL films before and after cycling 1000 times.
